## Evolution of the COVID Pandemic: A Technique for Mathematical Analysis of

### Data

K. Tennakone<sup>\*a</sup>, L. A. DeSilva<sup>b</sup>, K. J. Wimalasena<sup>c</sup> and Z. J. Welch<sup>b</sup>

<sup>a</sup> National Institute of Fundamental Studies, Sri Lanka

<sup>b</sup> University of West Georgia, United States

<sup>c</sup> University of Peradeniya, Sri Lanka

### Abstract

The analysis of COVID-19 statistics in different regions of the world with the intention of understanding the trend of progression of the pandemic is a task of paramount importance. Publicly available data includes cumulative number of cases, new cases each day, and the mortality. Extracting information from this data necessitates mathematical modeling. In this note a simple technique is adopted to determine the trend towards stabilized elimination of the infection. Results pertaining to several representative regions of the world are presented.

**Keywords:** Coronavirus, Mathematical modelling, COVID modelling, COVID

cumulative numbers

\*Email : [ktenna@yahoo.co.uk](mailto:ktenna@yahoo.co.uk)

## Introduction

A question of utmost importance to individual nations and the whole is how the COVID pandemic would progress and whether available statistics can be utilized to determine the future trend in terms of mathematical models. In this note, we present a simple technique of analyzing publicly available COVID data based on the cumulative number and new cases each day for several geopolitical regions. Analysis indicates a current general trend of cumulative COVID cases approaching an equilibrium – possibly a sign that the pandemic is slowly moving towards a halt, perhaps because of the effectiveness of control measures. In few regions, slow exponential growth seems to continue.

## Method and Discussion

The publicly available data on progression of COVID in different geographical regions of the world are:

(1) Cumulative number of cases  $N$  at the beginning of a given date (defined as at the instant of time  $t$ ).

(2) New cases  $dN$  reported at the end of that day (after a time interval  $dt = 1$ , therefore  $dN$  is effectively  $\frac{dN}{dt}$ ). The rate of growth can also be computed from

plots of  $N$  vs  $t$ . OriginLab data analysis software is used plot curves and perform correlation analysis.

The very initial growth of the epidemic in many regions has been exponential<sup>1-2</sup>, therefore we assume that it evolves according to the dynamical system equation,

$$\frac{dN}{dt} = N F(N) \quad (1)$$

where the growth constant  $F(N)$  is a function of  $N$ .

From (1)

$$\frac{d}{dN} \left( \frac{dN}{dt} \right) = N \frac{dF}{dN} + F(N) = N \frac{dF}{dN} + N^{-1} \frac{dN}{dt} \quad (2)$$

The pandemic stops brewing and reach an equilibrium when  $\frac{dN}{dt} = 0$  after attaining a certain cumulative number  $N = N_E$ . The point  $N = N_E$  is asymptotically stable<sup>3</sup> at this point, provided  $\frac{d}{dN} \left[ \frac{dN}{dt} \right] < 0$ . Clearly this condition satisfied if

$$\frac{dF}{dN} < 0 \text{ at } N = N_E \quad (3)$$

Eqn. (1) also embodies the requirement that point that point  $N = 0$  corresponds to an unstable equilibrium. To illustrate the point, consider the logistic model, where

$F(N) = a - bN$  ( $a$  and  $b$  positive constants), with the equilibrium point  $N_E = a/b$  as

$\frac{dF}{dN} = -b$ , the equilibrium is stable. The cumulative number of cases in some

epidemics approximately agree with the logistic model<sup>4-7</sup>. Our analysis shows that

COVID-19 cumulative numbers deviate from the logistic variation.

The plot of  $F(N)$  vs  $N$  is same as the plot of  $N^{-1} \frac{dN}{dt}$  vs  $N$ , if  $F(N)$  turns out be

monotonically decreasing and reaching zero, either cutting the  $N$ -axis or

approaching  $N$ -axis asymptotically, the pandemic will practically reach an

equilibrium. In the simple logistic model  $F(N)$  is a negative slope straight line,

cutting  $N$ -axis at the point of equilibrium. Possible scenarios are depicted in the Fig.

1 below, which portray different modes of variation of  $F(N)$  with  $N$ .

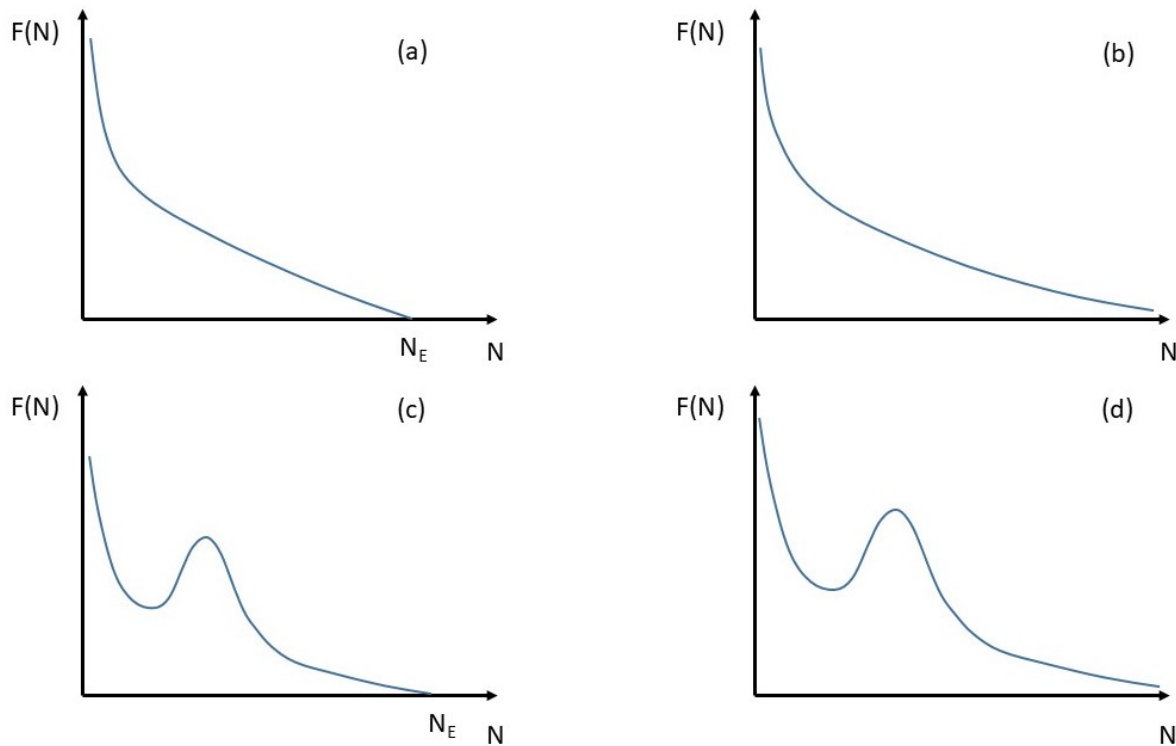

**Fig. 1:** Sketch of different modes of variation  $F(N)$  with  $N$ .

In the figures (a) and (b)  $F(N)$  decreases continuously, and in (a) a stable equilibrium is reached at  $N = N_E$ , whereas in (b) equilibrium is approached asymptotically. In figures (c) and (d), the monotonic decrease of  $N$  occurs after reaching a peak. In dealing with real data, the behaviour of  $F(N)$  at points close to  $N = 0$  is obviously erratic, but does not interfere with the subsequent trend.

The plots of  $F(N)$  vs  $N$  for several representative geopolitical regions are presented below. All computations are based on publicly available data<sup>8</sup>.

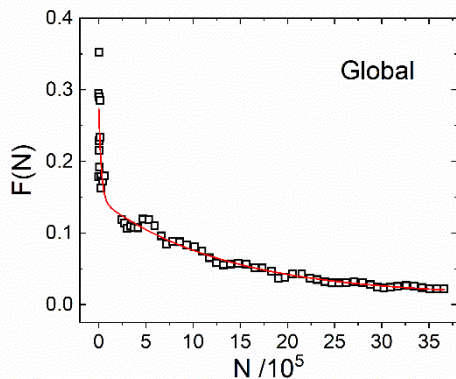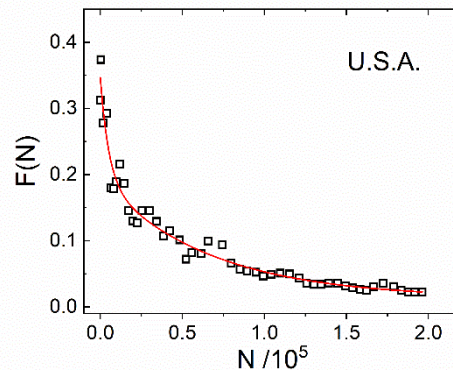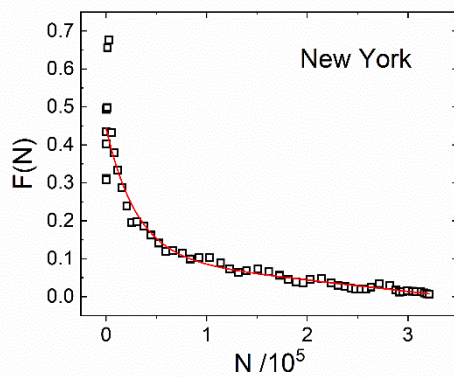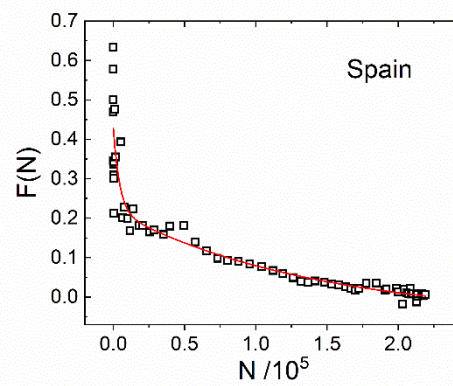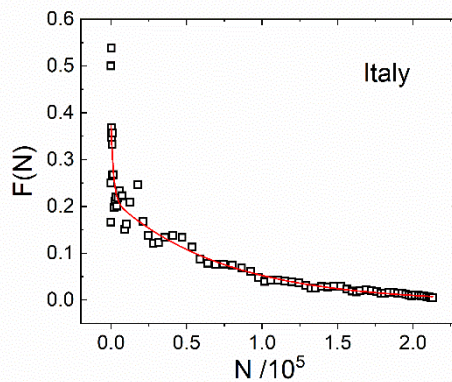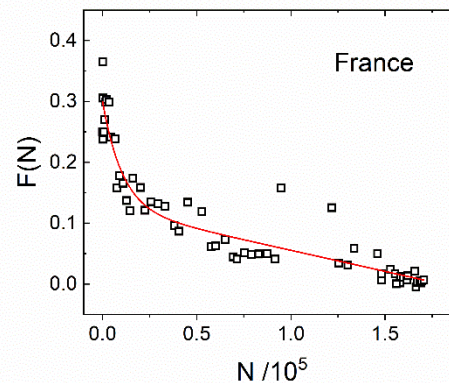



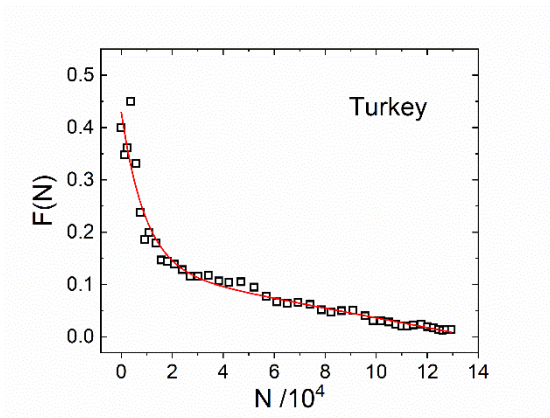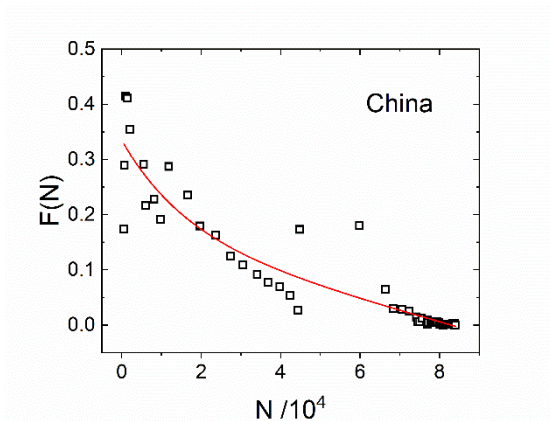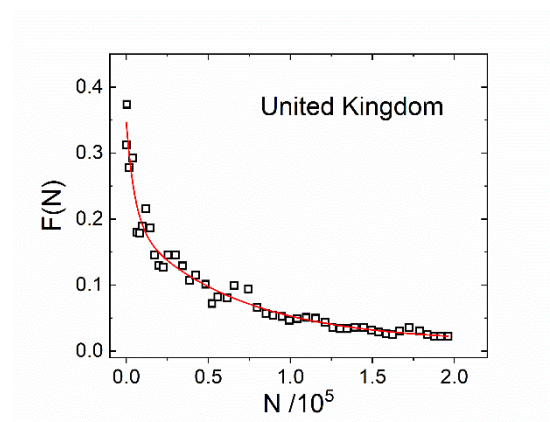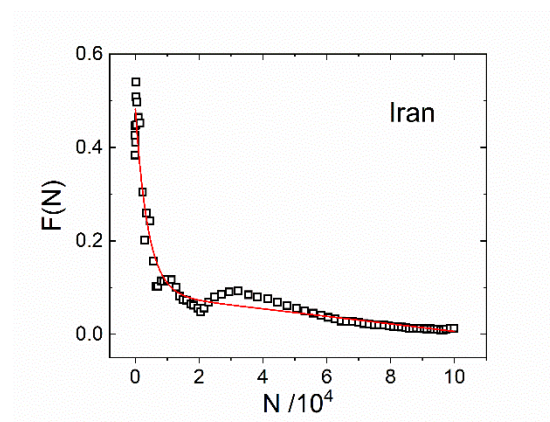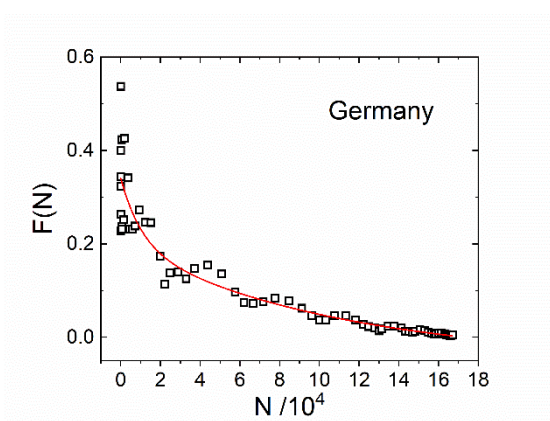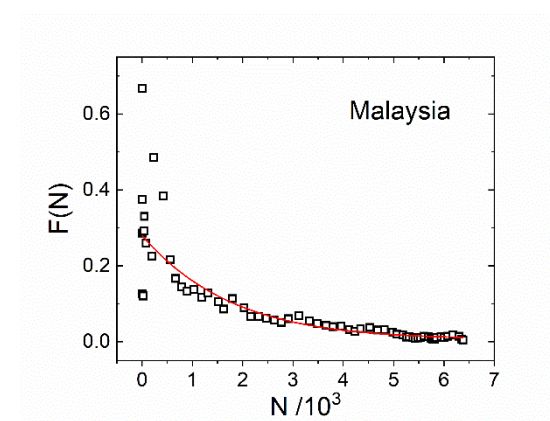

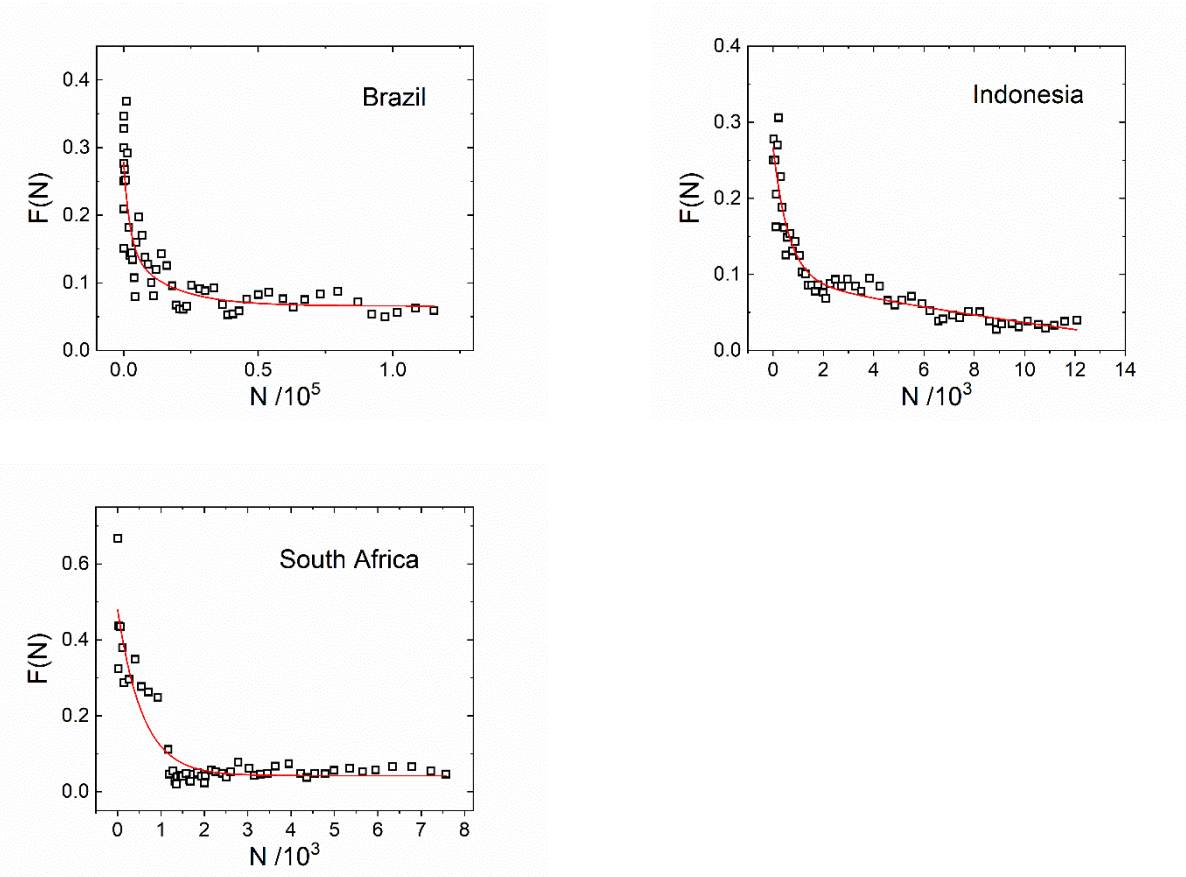

**Figs. 2:** Plots of  $F(N) = N^{-1} \frac{dN}{dt}$  vs  $N$  for different geopolitical regions of the world, the first plot gives sum cumulative cases for the world based on available data<sup>8</sup>.

In most the above plots the later trend in variation of  $F(N)$  with  $N$  is monotonic decrease, indicating that  $\frac{dF(N)}{dN}$  remains negative and approach  $N$ -axis towards a stable equilibrium. However, there is no signal yet that curves will cut the  $N$ -axis, abruptly halting the pandemic in the near future. In few plots the current trend approximates to a straight line nearly parallel to  $N$ -axis, indicating that slow exponential growth continue.



Fig. 3 shows the plot of  $F(N)$  vs.  $N$  for Sri Lanka. Although there is no matured COVID epidemic in Sri Lanka, the current trend is a monotonically decreasing  $F(N)$ .

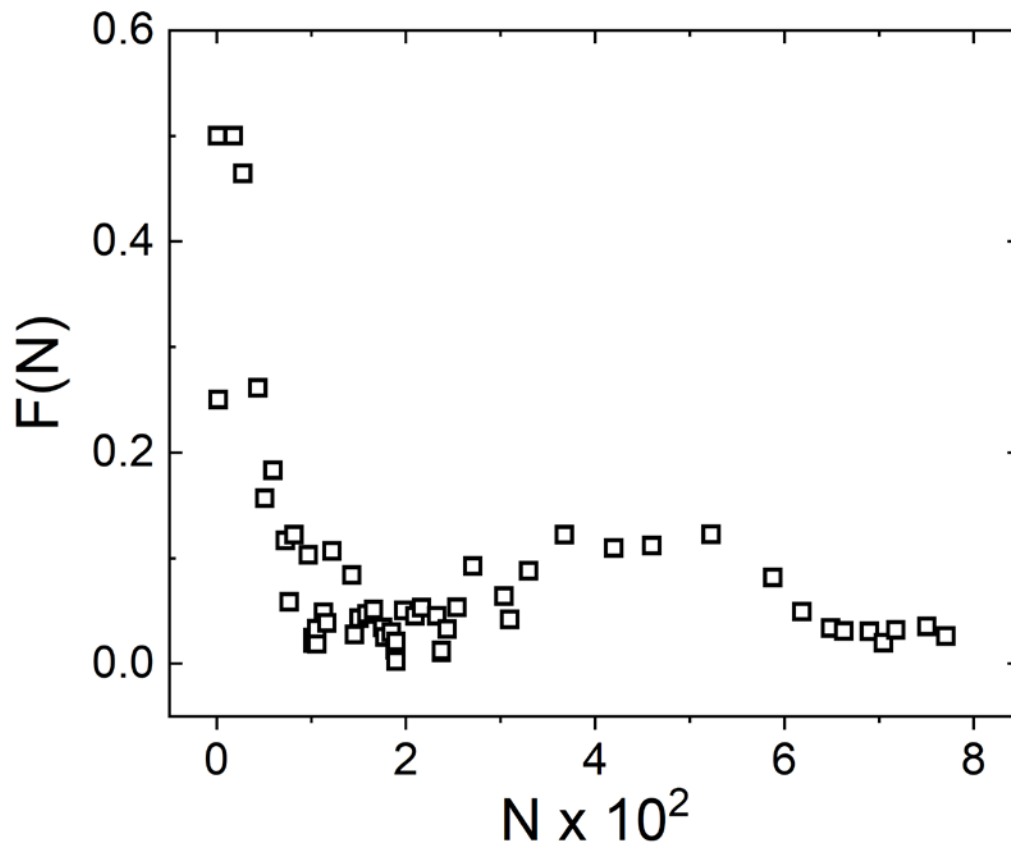

Fig. 3: Plots of  $F(N) = N^{-1} \frac{dF(N)}{dN}$  vs  $N$  for cumulative cases in Sri Lanka.

Relaxation of control measures, mutations of the virus or influences of the climate may alter the observed trends  $F(N)$  shown in Figs. 2 and 3.

A limitation of the model is assumption of the equation (1) where  $F(N)$  not an explicit function of  $t$ . Dynamical systems interpretations, apply only under the above assumption.

## Conclusion

The analysis suggests that fitting COVID-19 cumulative cases  $N$  to an equation of the form  $\frac{dN}{dt} = N F(N)$  gives insight into the progression pandemic in different regions. As  $\frac{dN}{dt}$  is essentially the number of cases reported each day, the function  $F(N)$  can be easily plotted. Since  $F(N) = \frac{dN}{dt} (\ln N)$ , this quantity can be readily ascertained from logarithmic plots of the cumulative number. The variation of  $F(N)$  with  $N$  depicts the progression towards stabilization of the cumulative number. If  $F(N)$  approaches  $N$ -axis with negative slope, indication is that the equilibrium point  $N_E$  within reach. This tendency is visible majority of the curves presented - most probably a signature of success of the containment measures. More information about evolution of the pandemic could follow on updating of the plots.

## Conflicts of Interest

Authors declare that there are no conflicts of interest

## Funding

This study is not funded by organization or an individual.

## Disclaimer

Authors are not responsible for the authenticity of data used and making decisions based on this study.

## Acknowledgement

Authors wish to thank Prof. D. Tantrigoda, University of Sri Jayewardhanapura, Sri Lanka for valuable discussions, constructive comments and reading the manuscript.

## References

1. S. Ansumali, M. K. Prakash, A very Flat Peak: Exponential growth phase of COVID-19 is mostly followed by a prolonged linear growth phase, medRxiv preprint doi: <https://doi.org/10.1101/2020.04.07.20055772>
2. B. F. Maier, D. Brockmann, Effective containment explains subexponential growth in recent confirmed COVID-19 cases in China, *Science* 27 (2020) 444.
3. C. P. Simon, J. A. Jacques, Reproduction number and stability of equilibria of SI models, *SIAM J.App.Maths.* 82 (1992) 541
4. B. Pell, Y. Kuang, C. Vibound, G. Chowell, Using phenomenological models for forecasting the 2015 Ebola challenge. *Epidemics* 22(2018)62
5. K. Burghardt, C. Verzijl, J. Huang, M. Ingram, B. Song, M. Hasne, Testing Modeling Assumptions in the West Africa Ebola Outbreak, *Sci.Rep.* 6(2016)34598

6. G. Chowell, C. Viboud, L. Simonsen, S. M. A. Vespignam, Perspectives on model forecasts of 2014-2015 Ebola epidemic in West Africa: Lessons and the way forward. BMC Medicine 15 (2017)42
7. E. Buyuktahtakin, E. des Bordes, E.Y. Kibis, A new epidemics-logistic model: Insights into controlling Ebola virus disease in West Africa, Eur.J. Oper. Res. 265 (2018) 1046
8. All Data Retrieved from JHU Data Repository:  
[https://github.com/CSSEGISandData/COVID-19/blob/master/csse\\_covid\\_19\\_data/csse\\_covid\\_19\\_time\\_series/time\\_series\\_covid19\\_confirmed\\_global.csv](https://github.com/CSSEGISandData/COVID-19/blob/master/csse_covid_19_data/csse_covid_19_time_series/time_series_covid19_confirmed_global.csv) (Last access 5/06/2020)
